# Supplementary material for: Transcriptional Control of Gene Expression and the Heterogeneous Cellular Identity of Erythroblastic Island Macrophages
Source: Front Genet. 2021 Nov 22;12:756028. doi: 10.3389/fgene.2021.756028 (PMC8646026; doi:10.3389/fgene.2021.756028)
Supplement: Supplementary file 1 [file Table2.XLSX]

## Sheet: Supp_Table
GENES ENRICHED IN BOTH EKLF/GFP+ AND EPOR-EGFP+ MACROPHAGES
Gene	EKLF/GFP_enriched	Epor-eGFP_enriched
Pklr	1.363	7.37233
Slc29a1	1.09998	1.60489
Abcb4	1.47614	3.72273
Lmna	1.57642	2.87703
Ermap	1.50854	6.07678
Alas2	1.658	1.98631
Rhd	1.71651	6.63963
Blvrb	1.48619	2.24633
Epor	1.65759	4.15166
Tmcc2	1.53955	2.27512
Slc11a2	1.40483	1.26831
Gstm5	1.52134	2.29945
Cpox	1.21054	1.43352
Hebp1	1.57741	3.95424
Ces2g	1.39021	3.52046
Tspan33	1.43132	2.6747
Tfrc	1.1117	1.75939
Tgm2	1.6979	1.99776
Rab3il1	1.33926	3.93743
Acp5	1.53809	2.52473
Slc4a1	1.21125	4.1869
Cldn13	1.69084	6.57759
Ptdss2	1.26086	1.18478
Car2	1.37668	2.74387
Cyb5a	1.34008	1.22318
Cd82	0.973551	1.3281
Hmbs	1.2135	1.15985
2021-09-08	1.18836	2.09913
Klf1	1.38923	3.64688
Mrap	1.38295	5.36225
2021-03-08	1.34245	1.45057
Hemgn	1.35717	2.09853
Nudt9	0.981636	1.02642
Fam213a	1.29281	2.17557
Fth1	1.06156	1.51682
Pla2g12a	1.26642	1.76705
Itsn1	1.30131	1.95937
Steap3	1.34467	1.13072
Pitrm1	0.812368	1.03039
Mthfd1	0.65314	1.62002
Slc16a1	0.678976	1.82791
Pabpc4	0.857745	1.19006
Pld3	1.01147	3.60547
Rgcc	1.01432	1.26465
Mns1	0.941259	1.01926
Mt1	0.826461	2.58928
Asns	1.24622	1.18614
Tns1	1.28471	2.23015
Aqp1	1.25265	3.75965
Ttll12	0.98655	1.45057
Creg1	0.810104	1.2031
Car1	1.17647	5.48748
Gcdh	0.752342	1.03013
Slc40a1	1.42596	3.99221
Wwp1	0.699856	1.94001
Odc1	0.690158	1.45901
Fabp5	0.923101	1.23896
Gclm	1.15307	1.11195
Slc48a1	0.661871	1.59832
Epx	1.12185	1.26968
Ctse	1.07483	1.50187
Ifrd2	0.839671	1.69095
Hmox1	1.29219	3.75822
Ppan	0.488071	1.05542
Ftl1	1.05217	1.38126
Kcnn4	1.35932	1.33532
Blvra	0.555382	1.31984
Fads1	0.525474	1.50538
Tbxas1	1.15297	1.03996
Paqr9	1.15144	5.70476
Mt2	1.16142	6.44248
Slc19a1	0.622162	1.38557
Rangrf	0.676948	1.3787
Pf4	2.52089	1.90669
Agpat3	0.784645	1.99486
Ctsb	0.689802	1.61347
Fcna	1.26645	6.03499
Cad	0.564834	1.17899
Fpgs	0.401472	1.45956
Plxna1	0.631018	3.81819
Nenf	0.724396	1.18337
Nat10	0.328782	1.01441
Cela1	1.8295	3.80824
Slc45a4	0.47172	1.06003
Heatr3	0.338226	1.14469
Natd1	1.23649	1.04137
Mrps28	0.434244	1.14699
Aldh18a1	0.399793	1.25998
Pdk1	0.404387	1.07185
Ctsd	0.44368	2.07428
Vcam1	0.905212	4.13771
Tmem65	0.605158	1.95933
Slc7a5	0.559453	1.21268
Cluh	0.278265	1.03047
Snx25	0.358269	1.61537
Wdr75	0.268698	1.02232
Igf1	1.10733	5.47366
Ipo4	0.397689	1.08874
C1qbp	0.256341	1.27386
