# Supplementary material for: Transcriptional Control of Gene Expression and the Heterogeneous Cellular Identity of Erythroblastic Island Macrophages
Source: Front Genet. 2021 Nov 22;12:756028. doi: 10.3389/fgene.2021.756028 (PMC8646026; doi:10.3389/fgene.2021.756028)
Supplement: Supplementary file 2 [file Table1.XLSX]

## Sheet: Sheet1
GO ANALYSIS OF ENRICHED GENE SET
GOID	TERM	CORRECTED_PVALUE
GO:0042168	heme metabolic process	4.57e-10
GO:0006778	porphyrin-containing compound metabolic process	3.47e-09
GO:0051186	cofactor metabolic process	3.53e-09
GO:0055076	transition metal ion homeostasis	6.97e-09
GO:0048878	chemical homeostasis	1.16e-08
GO:0042592	homeostatic process	1.43e-08
GO:0033013	tetrapyrrole metabolic process	1.73e-08
GO:0055072	iron ion homeostasis	1.01e-07
GO:0042440	pigment metabolic process	2.97e-07
GO:0046916	cellular transition metal ion homeostasis	3.54e-07
GO:0051188	cofactor biosynthetic process	5.33e-07
GO:0006879	cellular iron ion homeostasis	5.47e-06
GO:0050801	ion homeostasis	6.24e-06
GO:0065008	regulation of biological quality	3.11e-05
GO:0055082	cellular chemical homeostasis	4.13e-05
GO:0019725	cellular homeostasis	5.07e-05
GO:0098771	inorganic ion homeostasis	7.6e-05
GO:0042167	heme catabolic process	0.000318011
GO:0006787	porphyrin-containing compound catabolic process	0.000318011
GO:0046149	pigment catabolic process	0.000318011
GO:0055080	cation homeostasis	0.000383858
GO:0046394	carboxylic acid biosynthetic process	0.000499312
GO:0016053	organic acid biosynthetic process	0.000512357
GO:0006873	cellular ion homeostasis	0.000601737
GO:0033015	tetrapyrrole catabolic process	0.00079272
GO:0006826	iron ion transport	0.000895074
GO:0048821	erythrocyte development	0.00113551
GO:0019752	carboxylic acid metabolic process	0.00129426
GO:0061515	myeloid cell development	0.00141829
GO:0006783	heme biosynthetic process	0.00213684
GO:0043436	oxoacid metabolic process	0.00237121
GO:0030003	cellular cation homeostasis	0.00283084
GO:0006082	organic acid metabolic process	0.00331221
GO:0055065	metal ion homeostasis	0.00392767
GO:1901566	organonitrogen compound biosynthetic process	0.00431787
GO:0006779	porphyrin-containing compound biosynthetic process	0.00504871
GO:0033014	tetrapyrrole biosynthetic process	0.00504871
GO:0008152	metabolic process	0.00607864
GO:0009064	glutamine family amino acid metabolic process	0.00748445
GO:0030099	myeloid cell differentiation	0.00826776
GO:0055114	oxidation-reduction process	0.00890256
